1  
2  
3  
4  
5  
6  
7  
8  
9  
10  
11  
12  
13  
14  
15  
16  
17  
18  
19  
20  
21  
22  
23  
24  
25

**Saccadic adaptation in the presence of artificial central scotomas**

Youngmin Song<sup>1,2</sup>, Lydia Ouchene<sup>3</sup>, Aarlenne Z. Khan<sup>2</sup>

<sup>1</sup> Department of Anatomy and Cell Biology, McGill University

<sup>2</sup> Vision, Attention and Action Laboratory, School of Optometry, University of Montreal

<sup>3</sup> Faculty of Medicine, McGill University

Correspondence:

Aarlenne Z. Khan  
School of Optometry  
University of Montreal  
Room 260-25  
3744 rue Jean Brillant  
Montreal, QC, H3T1P1

26  
27  
28  
29  
30  
31  
32  
33  
34  
35  
36  
37  
38  
39  
40  
41  
42  
43  
44  
45

## Abstract

Saccadic adaptation can occur over a short period of time through a constant adjustment of the saccade target during the saccade, resulting in saccadic re-referencing which directs the saccade to a location different from the target that elicited the saccade. Saccade re-referencing could be used to help patients with age-related macular degeneration (AMD) to optimally use their residual visual function. However, it remains unknown whether saccade adaptation can take place in the presence of central scotomas (i.e., without central vision).

We tested participants in two experiments in a conventional double-step paradigm with a central gaze-contingent artificial scotoma. Experiment 1 ( $N = 12$ ) comprised a backward adaptation paradigm with a visible and an invisible  $3^\circ$  diameter scotomas. Experiment 2 ( $N = 13$ ) comprised a forward adaptation paradigm with invisible  $2^\circ$  and  $4^\circ$  diameter scotomas.

In Experiment 1, we observed significant adaptation in both the visible and invisible scotoma conditions comparable to the control condition with no scotoma. This was the case even when the saccade landed such that the target was occluded by the scotoma. We observed that adaptation occurred based on peripheral viewing of the stepped target during the deceleration period.

In Experiment 2, we found that both scotoma conditions showed adaptation again comparable to the control condition with no scotoma. We conclude that saccadic adaptation can occur with central scotomas, showing that it does not require central vision and is driven primarily by peripheral retinal error.

46

## Introduction

47 Saccades continue to be accurate even as one ages and extraocular muscles weaken because the  
48 brain monitors and adjusts the accuracy of saccades (Herman et al., 2013). This is known as  
49 saccadic adaptation. For example, saccades that undershoot or overshoot a target are adjusted over  
50 a short period of time so that subsequent saccades will have an amplitude closer to the target's  
51 distance. This is easily demonstrable in a lab setting using a double-step paradigm (McLaughlin,  
52 1967) in which a target's position is repeatedly shifted during the saccade. Gradually, saccades  
53 land closer to the shifted target position.

54 Saccadic adaptation could be used for rehabilitation of patients with age-related macular  
55 degeneration (AMD). In AMD, deterioration of the macula impedes visual acuity by affecting  
56 central vision (Cacho et al., 2010). Due to this, patients need to use their intact peripheral vision  
57 to access visual information. They can be trained or can spontaneously learn to consistently use  
58 one or more peripheral regions, known as preferred retinal loci (PRL) (Cheung & Legge, 2005;  
59 Chung, 2013; Crossland et al., 2005; Fletcher & Schuchard, 1997). Saccade re-referencing in  
60 which eye movements direct the PRL instead of the fovea to the object would greatly improve  
61 visual abilities (Cheung & Legge, 2005; Nilsson et al., 1998; Sunness et al., 1996; Walsh & Liu,  
62 2014; White & Bedell, 1990), speeding up visual discrimination in the periphery. However,  
63 directing the PRL to the object instead has shown to be extremely difficult and if successful, can  
64 take years (Cheung & Legge, 2005; Krauzlis et al., 2017). One possibility to achieve saccade re-  
65 referencing is through training using saccadic adaptation. Here, we investigate whether saccadic  
66 adaptation can occur in the presence of a central scotoma, and if so to what extent.

67 Despite the multitude of studies on saccadic adaptation, the nature of the error signal that drives it  
68 has not been fully resolved. If central vision is necessary for saccadic adaptation, then it is unlikely  
69 to occur with a central scotoma. Many studies have indirectly shown that central vision is  
70 unnecessary for adaptation. For instance, some have shown that similar amounts of adaptation  
71 occurred even when the task was modified to elicit very few corrective saccades (Noto & Robinson,  
72 2001; Wallman & Fuchs, 1998). Thus, feedback based on central vision after the corrective  
73 saccade is not necessary for adaptation. Similarly, other studies have suggested that adaptation  
74 occurs in response to a *peripheral* retinal error after the first saccade (Noto & Robinson, 2001;  
75 Wallman & Fuchs, 1998) or a difference between the post-saccadic retinal image and predicted

76 image, again based entirely on *peripheral vision* of the desired target (Bahcall & Kowler, 2000).  
77 For example, Bahcall and Kowler (2000) demonstrated backward saccadic adaptation during a  
78 task in which participants were instructed to saccade partway to a target (75% of the distance from  
79 initial fixation point), which could not be based on retinal error. Furthermore, recent evidence has  
80 shown that even intra-saccadic visual feedback received mid-flight during a saccade is sufficient  
81 to result in saccadic adaptation (Panouillères et al., 2016; Panouillères et al., 2013). These findings  
82 support that peripheral visual information is used for adaptation rather than central. However,  
83 notably, it has not yet been demonstrated that occlusion of central vision does not impact  
84 adaptation in any way. It may be that central vision (for example after the corrective saccade or  
85 once adaptation has occurred) plays a role in adaptation, such as determining when to stop adapting.  
86 Occlusion of the target after the corrective saccade might be interpreted as a change in the external  
87 visual scene, which might also impact saccadic adaptation.

88 It is unclear whether there are limits to the eccentricity of peripheral visual information that can  
89 drive adaptation. If so, different sized scotomas may have different influences on adaptation.  
90 Robinson et al. (2003) tested saccadic adaptation in monkeys and showed that adaptation was most  
91 consistent for target shifts of 20 to 60% of the target eccentricity, with a decrease in adaptation for  
92 greater eccentricities (although not for forward adaptation), as well as inconsistent adaptation for  
93 smaller target shifts (<20%). However, this has not been tested in humans, who show quicker  
94 adaptation as well as stronger effects compared to monkeys (Albano & King, 1989; Deubel et al.,  
95 1986; Straube et al., 1997). Also, it should be noted that the number of adaptation trials was  
96 extensive (400 to 2,800). With human participants and fewer trials, it is uncertain whether larger  
97 scotomas would result in the shifted target being occluded sooner during the saccade and thus  
98 reduce the amount of adaptation. We therefore tested if changing the size of the scotoma influences  
99 adaptation.

100 While adaptation has been shown to occur in both backward and forward target shifts, there are  
101 many differences between backward and forward adaptation. For one, forward adaptation is less  
102 efficient, takes longer, and results in less gain change compared to backward adaptation (Ethier et  
103 al., 2008; Hernandez et al., 2008; Panouillères et al., 2009; Straube & Deubel, 1995). But more  
104 importantly, there is both behavioural and neurological evidence that they have different  
105 underlying neuronal mechanisms (Pélisson et al., 2010). A popular model is that while backward

106 adaptation is caused by a decrease in saccade gain, forward adaptation relies on a remapping  
107 mechanism (Ethier et al., 2008; Hernandez et al., 2008; Semmlow et al., 1989). Neurological  
108 evidence also suggests a difference in mechanism such as Purkinje cells in the cerebellum firing  
109 differently in forward and backward adaptation (Catz et al., 2008) and forward adaptation being  
110 more affected by cerebral lesions than backward (Golla et al., 2008). Therefore, we tested both  
111 paradigms with central scotomas to determine if there are any differences in the amount of  
112 adaptation.

113 We also tested whether saccadic adaptation is impacted by the visibility of the scotoma. For  
114 example, a visible scotoma provides continuous feedback of the eye position during the adaptation  
115 task and may negatively impact adaptation since it provides more accurate information about the  
116 target position and shifts relative to eye position.

117 In summary, we investigated whether adaptation can occur in response to only peripherally viewed  
118 targets in the presence of an artificial central scotoma. In Experiment 1, we used a backward  
119 adaptation paradigm and varied the visibility of the scotoma (visible and invisible). In Experiment  
120 2, we used a forward adaptation paradigm and tested invisible scotomas of two different sizes ( $2^\circ$   
121 and  $4^\circ$ ). We found that in both experiments with central scotomas, saccadic adaptation occurred  
122 to a degree similar to those in the control conditions.

123

## 124 **Experiment 1**

125

### **Methods**

#### 126 **Participants**

127 Twelve participants took part in this study (three male, age range: 19-40,  $M = 22.92$ ,  $SD = 5.52$ ,  
128 including two authors AK and LO). All participants had normal or corrected-to-normal vision and  
129 no known neurological impairments. All gave written informed consent to participate in the  
130 experiment. All procedures were pre-approved by the Health Research Ethics Committee at the  
131 University of Montreal. (16-129-CERES-D).

#### 132 **Apparatus**

133 Participants sat in a dark room facing a VIEWPixx LCD monitor (VPixx Technologies, Montreal,  
134 QC, 120 Hz), its center aligned horizontally with the participant's mid-sagittal plane and vertically  
135 at eye level. The screen dimensions were 52.1 cm by 29.2 cm. The screen was 62 cm from the  
136 participant's eyes. The participants' heads were immobilized via a chin and forehead support  
137 placed at the edge of the table on which the monitor was located. Eye-movements were recorded  
138 using an infrared-emitting video-based eye tracker (EyeLink 1000 Plus, SR Research,  
139 Mississauga, ON, Canada). The backlight on the screen was set to a very low setting to ensure that  
140 the monitor frame was not easily visible (ViewPixx, back light setting: 5). The position of the right  
141 eye was recorded at 1000 Hz using the EyeLink 1000 video-based eye tracker (SR Research).

142 The scotoma was centered on the participant's foveal vision based on a 2-step calibration process  
143 at the beginning of each experimental session. First, the standard nine-point EyeLink  
144 calibration/validation procedure was performed tracking the participant's right eye. A second 30-  
145 point calibration was then performed to calculate horizontal and vertical correction values to  
146 precisely align the scotoma on the fovea of the participant. Participants were asked to look at each  
147 of the 15 fixation discs (black on white background,  $0.25^\circ$  diameter spanning  $4/5^{\text{th}}$  of the screen)  
148 which were presented in random order and press a button when they were fixating accurately. A  
149 custom code mapped the eye positions to the fixation disc locations using a polynomial regression  
150 with 6 parameters. These parameters were then used to adjust eye position for scotoma presentation.  
151 The standard calibration resulted in a mean error of  $2.21^\circ$  in absolute distance (distance between  
152 recorded position and the actual gaze position) while the second calibration used for the artificial  
153 scotoma position reduced this error to  $0.53^\circ$  in absolute distance.

154 In terms of timing, the minimum delay between the position of the eye and the scotoma was  
155 approximately 3 ms and the maximum was 8.3 ms. The end-to-end sample delay for eye recording  
156 at 1000 Hz was 1.95 ms (SR Research, Kanata, Canada). In addition, there was approximately 1  
157 ms between the time at which the eye position was determined and the rendering of the scotoma.  
158 As the screen refresh rate (120 Hz/8.3 ms) was slower than all eye-tracking and artificial-scotoma-  
159 related delays, these delays necessarily went unnoticed by the participants. Nonetheless, to ensure  
160 the precise tracking of our participants' eyes, we ordered the computer to use the first sample from  
161 the eye-tracker following each new frame drawing to position the scotoma. Such an approach  
162 allowed us to ensure that the scotoma would be updated for every single frame. Considering that

163 our eye-tracker was recording at 1000 Hz, we would expect 8 (or 9 in certain cases) eye tracking  
164 samples in-between frames. Finally, we wished to prevent the scotoma from following the eye  
165 during blinks (Aguilar & Castet, 2011); to do so, we froze the scotoma in place and blurred the  
166 screen whenever the velocity in the vertical direction exceeded  $900^\circ/\text{sec}$  or when eye movement  
167 was not detected.

## 168 Procedure

169 Stimuli used are shown in Figure 1. A white oval fixation stimulus was used instead of a small dot  
170 or cross to ensure that participants would be able to fixate even in the presence of the scotoma. It  
171 was located  $4.9^\circ$  left of the center horizontally, at the center of the screen vertically, and was  $0.9^\circ$   
172 by  $4.8^\circ$  in size. The target for the first saccade (referred to as T1) was located  $9.7^\circ$  right of the  
173 center ( $14.6^\circ$  right of fixation), and the second target (referred to as T2) was located  $4.9^\circ$  left of  
174 T1 ( $9.7^\circ$  right of fixation). Both targets were white filled circles with a diameter of  $0.5^\circ$  (Fig. 1A).

175 **Figure 1.**

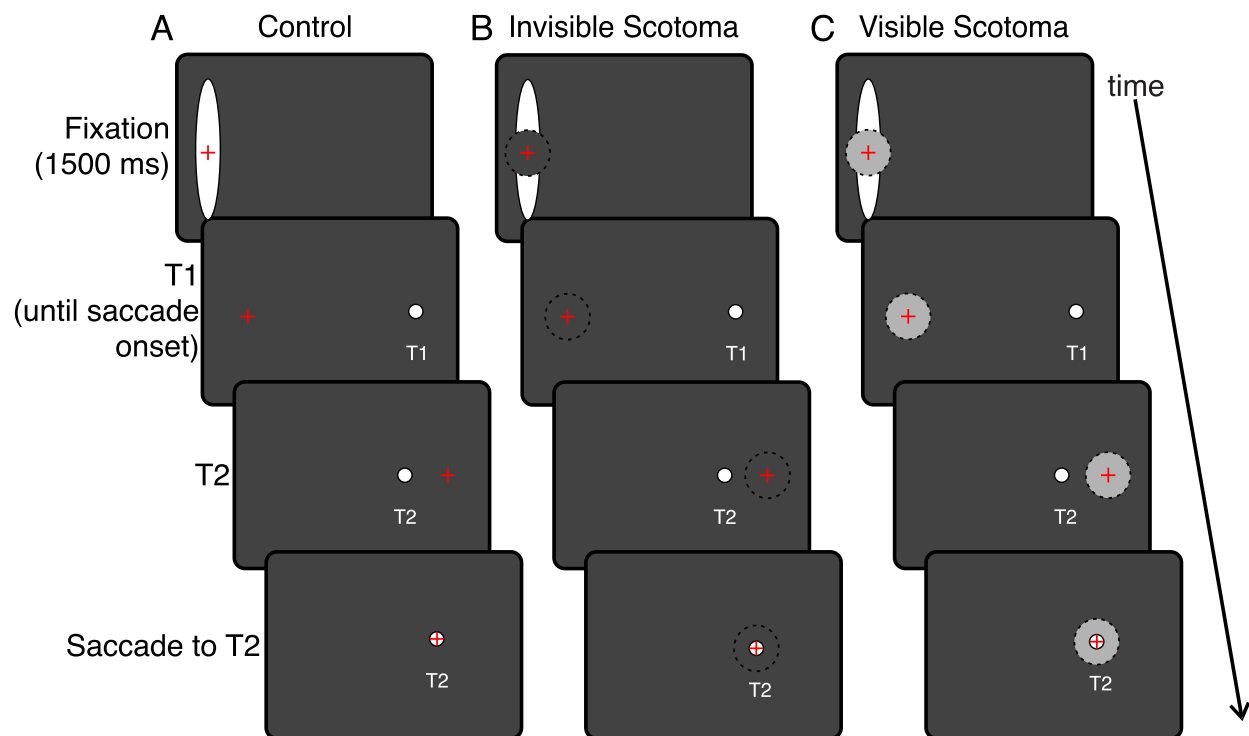

176  
177 Stimuli and procedure (Experiment 1). The red cross represents the participant's gaze position. In  
178 (B) and (C), the black dotted circle outlines the scotoma. After the second saccade, T2 would be

179 covered by the scotoma and thus not be visible to the participant. The black background of the  
180 screen is depicted as dark grey for visibility.

181 In the scotoma conditions, a black (invisible) or grey (visible) circular central scotoma ( $3^\circ$  in  
182 diameter) was present. The invisible scotoma was the same colour as the background (i.e. black)  
183 and thus not visible (*Fig. 1B*). Its presence was perceived only when occluding stimuli such as the  
184 fixation oval. The grey scotoma was visible due to the difference in luminance from the  
185 background (*Fig. 1C*). Therefore, it provided information about current eye position to the  
186 participant.

187 Participants took part in three sessions for the adaptation task, completing one of the three  
188 conditions (control, invisible scotoma, and visible scotoma) each week in random order. Each  
189 session was performed at least one week apart to ensure that there was no retention of adaptation  
190 (Alahyane & Pélisson, 2005).

191 Each session comprised three consecutive blocks. The first block was a pre-adaptation block of 20  
192 trials, in which only T1 was illuminated and extinguished at saccade onset. There was therefore  
193 no visual feedback after the first saccade was completed. The second block was the adaptation  
194 block, consisting of 180 trials with presentation of both T1 and T2. The last block was the post-  
195 adaptation block, which was identical to the pre-adaptation block. The three blocks were run  
196 continuously in sequence with no interruption or breaks. In total participants performed 220 trials  
197 per session.

198 In the adaptation block, each trial began with the presentation of the fixation oval which  
199 participants were asked to look at (*Fig.1*). After 1500 ms, T1 appeared and participants were  
200 instructed to look at it as soon as it appeared. Upon detection of a saccade, T1 was extinguished  
201 and T2 was displayed. T2 remained visible for 500 ms. After an inter-trial interval of 500 ms, the  
202 fixation oval reappeared and the next trial was initiated.

### 203 **Data Analysis**

204 We collected a total of 7,920 trials from 12 participants. Saccade timing and position were  
205 automatically calculated offline using a saccade detection algorithm with a velocity criterion of  
206  $15^\circ/\text{s}$  and verified visually. Manual inspection involved removing trials in which saccades were  
207 made before the first target appeared, there was a blink during the saccade, the tracker lost eye



208 position, or participants made eye movements not directed toward T1. In total, there were 744  
209 trials removed (9.4% of total trials). We also removed trials in which saccade reaction times were  
210 too short (less than 80 ms) or too long (more than 500 ms). There were 127 such trials (1.6% of  
211 all trials). Then, we normalized trials in each block by adjusting them by how much the mean  
212 saccade start point deviated from fixation point. This was to account for any errors in the  
213 calibration process. As mentioned earlier, the accuracy of the eye movement recording was  $0.53^\circ$ .  
214 The precision of eye movement recording is much higher (Eyelink reports  $0.01^\circ$  RMS for the  
215 Eyelink 1000 Plus). Therefore, while there may be an offset in the eye movement recording, this  
216 offset is constant, and precision remains high. We accounted for this offset by normalizing the  
217 saccade eye positions for each block.

218 We removed 28 trials (0.4%) in which participants' saccades did not begin near the fixation  
219 stimulus center (more than  $2^\circ$  away horizontally or vertically) and 2 trials (0.03%) with extremely  
220 large saccade amplitude ( $20^\circ$  or more). In addition, we removed 128 outlier trials (1.6%) in which  
221 the amplitude of the first saccade was more than 2.5 standard deviations away from the mean for  
222 each session.

223 Gain was calculated as the actual saccade amplitude divided by the desired saccade amplitude. The  
224 actual saccade amplitude is the difference between horizontal start and end positions of the first  
225 saccade. The desired saccade amplitude is the difference between horizontal start position of the  
226 first saccade and T1 target position ( $9.7^\circ$ ). Thus, a gain of one would indicate that the saccade  
227 reached T1, and a gain less or greater than one would mean that the participant undershot or  
228 overshot the target respectively. We removed 103 gain outlier trials (1.3%) in which gain was more  
229 than 2.5 standard deviations away from the mean for each session. In total, there remained 6,788  
230 trials (85.7%).

231 We calculated the mean gain in the pre-adaptation block and the post-adaptation block for each  
232 participant and condition. We determined change in gain for each session as the difference between  
233 mean gain in pre-adaptation trials and the mean gain in post-adaptation trials. Also, we calculated  
234 the percentage of trials with corrective saccades in the adaptation blocks. Corrective saccades were  
235 determined using the following criteria: 1) the start position of the second saccade was less than  
236  $1^\circ$  from the end position of the first saccade, 2) the endpoint of the second saccade was within  $5^\circ$   
237 horizontally of T2, and 3) the saccade had an amplitude greater than 0 and was directed towards

238 T2. Data were analyzed using MATLAB (MATLAB and Statistics Toolbox Release 2018a) and  
239 statistical analyses were done with SPSS (SPSS Statistics for Windows, Version 25.0).

240

241

## Results

242 *Figure 2* shows the first saccade endpoints of a typical participant for all three conditions. In all  
243 three conditions, there was a shift in saccade endpoints from T1 (dotted line) to T2 (solid line),  
244 demonstrating adaptation. Moreover, this was similar across conditions. We also observed that  
245 participants tended to undershoot T1 (dotted line) in the pre-adaptation block in all conditions.  
246 Interestingly, in the invisible (*Fig. 2B*) and visible (*Fig. 2C*) conditions, the participants' first  
247 saccade endpoints landed so that T2 was occluded by the scotoma (gray region) relatively early in  
248 the adaptation block. Nevertheless, adaptation appeared to be the same. These observations are  
249 quantified across all participants below.

250

251

252

253

254

255

256

257

258

259

260

261

262

263

264

265

266

267

268

269 **Figure 2.**

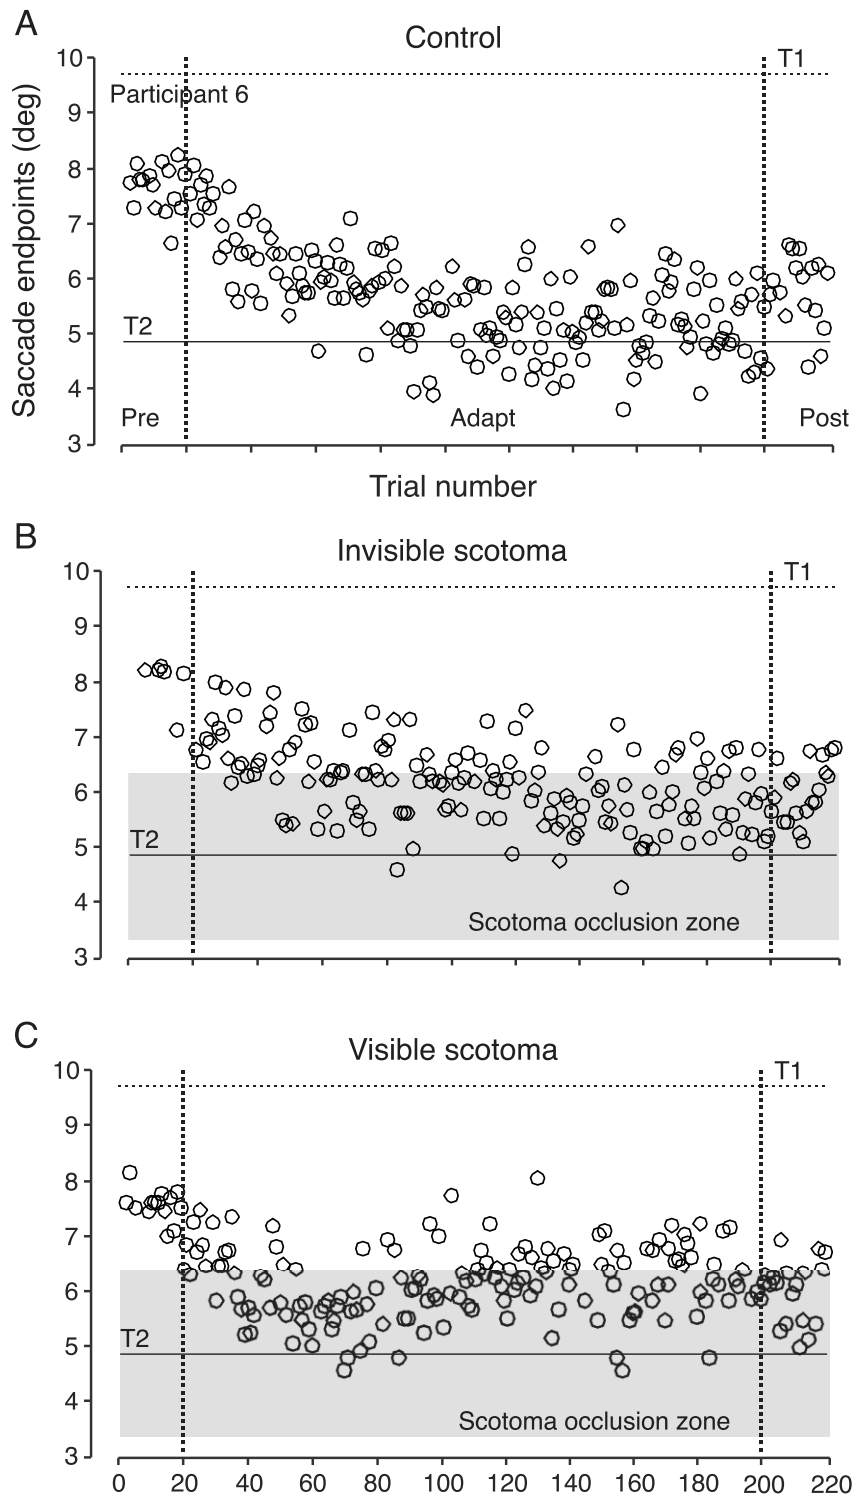

270

271 Saccade endpoints of a typical participant (Experiment 1). First saccade endpoints are denoted by

272 black empty circles. Filled in grey is the scotoma occlusion zone, which is 1.5° or less away from

273 T2.

274 **Degree of saccadic adaptation**

275 In *Fig. 3A* are depicted the mean gains in the pre- and post-adaptation blocks for each condition.  
276 We performed a two-way repeated measures ANOVA with condition (control, invisible, and  
277 visible) and block (pre, post) as factors. The change in mean gain for each participant was used, as  
278 explained previously. There was a decrease in gain from pre- to post-adaptation blocks in all three  
279 conditions, confirmed by a significant main effect for block ( $F(1,11) = 18.7, p < 0.001$ ). In addition,  
280 we found a significant main effect of condition ( $F(2,22) = 5.99, p = 0.008$ ) and a significant  
281 interaction effect ( $F(2,22) = 6.84, p = 0.005$ ). This indicates that the presence of scotoma and its  
282 type affected the amount of adaptation. Post-hoc tests showed that there was a significant decrease  
283 in gain in all three conditions. We confirmed that adaptation occurred for the control condition  
284 (*Fig. 3, left bars*). A paired t-test between mean gain in the pre-adaptation trials ( $M = 0.86, SD =$   
285  $0.05$ ) and post-adaptation trials ( $M = 0.73, SD = 0.05$ ) was significant ( $t(11) = 9.49, p < 0.001$ ).  
286 There was a 14% decrease between the mean gains of pre- and post-adaptation trials, which is  
287 about half of the target shift (33% decrease). There was also a significant decrease in the invisible  
288 condition (invisible pre  $M = 0.84$ , invisible post  $M = 0.68, t(11) = 13.5, p < 0.001$ ) as well as the  
289 visible condition (visible pre  $M = 0.81$ , visible post  $M = 0.71, t(11) = 8.29, p < 0.001$ ).

290

291

292

293

294

295

296

297

298

299

300

301

302

303

304

305 **Figure 3.**

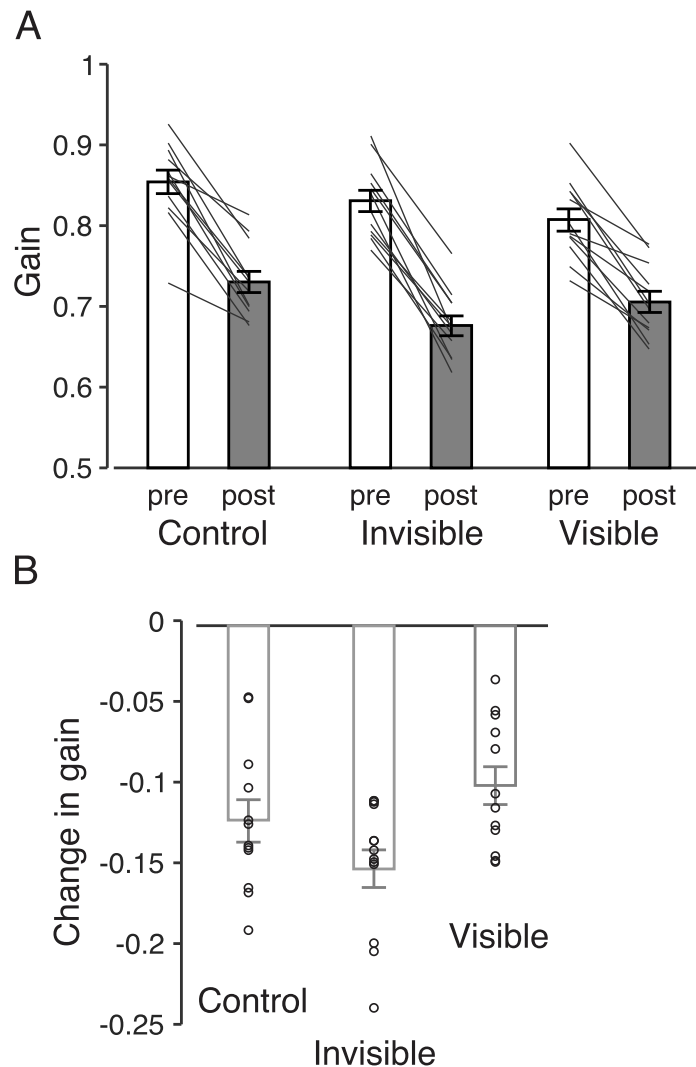

306  
307 Mean saccade gain by block and condition (Experiment 1). (A) shows the mean gain for the pre-  
308 (white bars) and the post-adaptation blocks (gray bars) for each condition as well as individual  
309 gains from each participant (thin black lines). (B) shows a bar graph of the change in mean gain  
310 between pre- and post-adaptation block for each condition. Open dots represent individual mean  
311 gains for each participant.

312  
313 In addition, we performed two one-way ANOVAs for the pre- and post-adaptation blocks  
314 separately. For the pre-adaptation block, the ANOVA was significant ( $F(2,22) = 4.8, p = 0.018$ ).  
315 Post-hoc t-tests showed significant differences between control ( $M = 0.86$ ) and visible ( $M = 0.81$ ,  
316  $t(11) = 3.32, p = 0.007$ , Bonferroni-Holm familywise error rate) conditions, but no other  
317 differences. For the post-adaptation block, the ANOVA was also significant ( $F(2,22) = 8.03, p =$

318 0.002). Post-hoc t-tests showed significant differences between control ( $M = 0.73$ ) and invisible  
319 ( $M = 0.68$ ,  $t(11) = 3.9$ ,  $p = 0.002$ ) conditions, and between visible ( $M = 0.71$ ) and invisible ( $M =$   
320  $0.68$ ,  $t(11) = 2.8$ ,  $p = 0.018$ ) conditions. There was no significant difference between control and  
321 visible conditions ( $p = 0.16$ ). In summary, it appears that participants had smaller gains in the pre-  
322 adaptation block of the visible condition, possibly due to visual feedback of eye position. This was  
323 not the case in the post-adaptation block.

324 To compare difference in adaptation, we compared change in gain between pre- and post-  
325 adaptation blocks for the three conditions (*Fig. 3B*). First, we confirmed that there was significant  
326 change in gain through one-sample t-tests. All three conditions showed changes in gain that were  
327 significantly different from 0 (all  $p < 0.001$ ). A one-way repeated-measures ANOVA on gain  
328 change with condition as a factor was significant ( $F(2,22) = 6.83$ ,  $p = 0.005$ ). Post-hoc testing  
329 revealed that gain reduced to a greater degree for the invisible ( $M = -0.15$ ) compared to the visible  
330 ( $M = -0.12$ ,  $t(11) = 3.3$ ,  $p = 0.007$ ) condition, but there were no differences between invisible and  
331 control ( $M = -0.12$ ,  $p = 0.043$ , Holm-Bonferroni family-wise error rate = 0.025), nor between  
332 control and visible ( $p = 0.13$ ). In summary, adaptation was largest for the invisible condition and  
333 smallest for the visible condition, with no significant differences from control, whose gain was in  
334 between the two.

335

### 336 **Occlusion of the 2<sup>nd</sup> target by the scotoma**

337 As shown in *Fig. 2A* and *B*, around midway in the adaptation block, many saccade endpoints  
338 landed within the scotoma occlusion zone. In other words, for any saccade endpoint that landed at  
339  $6.35^\circ$  or less, the scotoma occluded T2. It appears that this did not impact adaptation, however.  
340 We calculated the percentage of saccade endpoints that landed within this zone for all participants.  
341 The amount of occlusion was quite substantial, ranging from 47% to 96% for the invisible  
342 condition ( $M = 84\%$ ,  $SD = 15.7\%$ ) and 34% to 98% for the visible condition ( $M = 73\%$ ,  $SD =$   
343  $25.5\%$ ). We compared each participant's amount of gain change and the percent of occlusion for  
344 each condition to investigate whether increased occlusion led to decreased adaptation. As expected,  
345 given that the invisible condition showed more adaptation with more occlusion, we did not find a  
346 significant relationship for either condition ( $p > 0.05$ ).

347 In order to determine when the target was occluded relative to the ongoing saccade during the  
348 adaptation block, we first calculated when T2 appeared relative to saccade onset. On average, T2

349 appeared 37.1 ms ( $SD = 3.3$  ms, across participants) after saccade onset in the control condition,  
350 38.8 ms ( $SD = 3.6$  ms) in the invisible condition and 37 ms ( $SD = 3.7$  ms) in the visible condition.  
351 We confirmed that there were no significant differences across conditions through a repeated-  
352 measures ANOVA ( $p > 0.05$ ). With respect to saccade peak velocity, T2 appeared very slightly  
353 ahead of peak velocity time of the saccade, appearing on average 2.3 ms before ( $SD = 4.8$  ms) for  
354 the control condition, 3 ms ( $SD = 5.3$  ms) for the invisible condition and 2.6 ms ( $SD = 4.3$  ms) for  
355 the visible condition. Again, there were no differences across conditions ( $p > 0.05$ ). Next, we  
356 calculated the duration of T2 visibility, which was the time between when T2 appeared and when  
357 it was occluded by the scotoma (during the saccade). In other words, the latter is the point during  
358 which the saccade was at the T2 position minus  $1.5^\circ$ . On average, before being occluded by the  
359 scotoma, T2 appeared for 18.7 ms ( $SD = 8.6$  ms) in the control condition, 17.6 ms ( $SD = 7.2$  ms)  
360 in the invisible condition, and 16.5 ms ( $SD = 6.9$  ms) in the visible condition. As before, there were  
361 no differences across conditions ( $p > 0.05$ ). Note that these calculations were made for all saccades.  
362 To summarize, T2 appeared mostly during the deceleration phase of the saccade, from just before  
363 peak velocity. As described above, only a certain percentage of these saccades had amplitudes for  
364 which T2 remained occluded even at the end of the saccade. Other saccades had larger amplitudes,  
365 so that by the end of the saccade T2 was no longer occluded. In short, viewing T2 for  
366 approximately 15 ms during the later stages of the saccade was sufficient to drive adaptation, as  
367 previously shown (Panouillères et al., 2013).

368

### 369 **Corrective saccades**

370 We investigated whether there was a relationship between the number of corrective saccades  
371 performed and the amount of adaptation. We observed that across all conditions, half (6) the  
372 participants made no corrective saccades. Two participants made minimal corrective saccades in  
373 one of the conditions (participant 5, control condition, 5%; participant 6, invisible condition, 8%).  
374 For the four remaining participants, 69% of all trials comprised corrective saccades ( $SD = 23\%$ )  
375 for the control condition, 41% ( $SD = 31\%$ ) for the invisible condition, and 41% ( $SD = 41\%$ ) for  
376 the visible condition.

377 There were no significant differences overall across the conditions ( $F(2, 22) = 3.29, p = 0.06$ ).  
378 Moreover, there was no significant relationship between mean change in gain and the percentage

379 of corrective saccades in any of the 3 conditions ( $p > 0.05$ ). These results show that corrective  
380 saccades did not play a role in adaptation.

381

## 382 **Experiment 1 Summary**

383 Participants showed backward saccadic adaptation in all three conditions. Overall, the amount of  
384 adaptation was similar across the three conditions, even with some feedback of T2 during the later  
385 stages of saccades. These results show that occlusion of central vision does not affect adaptation.  
386 However, a concern with the backward adaptation paradigm is that fatigue may have caused a  
387 large proportion of saccade gain decrease. Although extraocular muscles tend to be relatively  
388 resistant to fatigue (Fuchs & Binder, 1983; Saito, 1992), it has been shown in both humans (De  
389 Gennaro et al., 2000, 2001; Rowland et al., 2005; Sprenger et al., 2005) and monkeys (Straube et  
390 al., 1997; Straube et al., 1997) that fatigue can affect saccade metrics. Therefore, the amounts of  
391 adaptation during the scotoma conditions might be related to fatigue rather than adaptation per se.  
392 In addition, our results for backward adaptation may not be generalizable to forward adaptation.  
393 Backward and forward adaptation are likely based on different mechanisms (Catz et al., 2008;  
394 Ethier et al., 2008; Golla et al., 2008; Hernandez et al., 2008; Pélisson et al., 2010; Semmlow et  
395 al., 1989). Therefore, we cannot make conclusions about forward adaptation based on results from  
396 this first experiment.

397 In order to address these outstanding issues, we performed a second experiment in which forward  
398 adaptation was tested. In this experiment, we used two differently sized invisible central scotomas.  
399 By varying the diameter of scotoma, we could investigate how the eccentricity of the viewed  
400 peripheral T2 affects adaptation. A larger scotoma results in larger eccentricities of T2 relative to  
401 the fovea that are not occluded.

## 402 **Experiment 2**

403

### **Methods**

404 This experiment was almost identical to Exp. 1, with a few changes that are outlined below.

405

## 406 **Participants**



407 Thirteen participants took part in this study (four male, age range: 19-42,  $M = 24.38$ ,  $SD = 5.84$ ,  
408 including the author AK). All participants had normal or corrected-to-normal vision, no known  
409 neurological impairments, and gave written informed consent to participate in the experiment.

410

### 411 Procedure

412 Stimuli were presented with custom code using MATLAB (The Math Works Inc., Natick, MA)  
413 with Psychtoolbox (Brainard & Vision, 1997; Pelli & Vision, 1997) and EyeLink toolboxes  
414 (Cornelissen et al., 2002). The procedure was the same as described in Exp. 1. There were three  
415 conditions in total: a control condition with no scotoma, a  $2^\circ$  diameter scotoma condition, and a  
416  $4^\circ$  diameter scotoma condition. Aside from the presence of a scotoma and its size, all conditions  
417 were identical.

418 Stimuli used are shown in *Figure 4*. The white fixation oval was identical to that in Exp. 1. The  
419 target for the first saccade (referred to as T1) was located  $5^\circ$  right of the center ( $10^\circ$  right of  
420 fixation), and the second target (referred to as T2) was located  $5^\circ$  right of T1 ( $15^\circ$  right of  
421 fixation). Both targets were white filled circles with a diameter of  $0.5^\circ$ .

422

423 **Figure 4.**

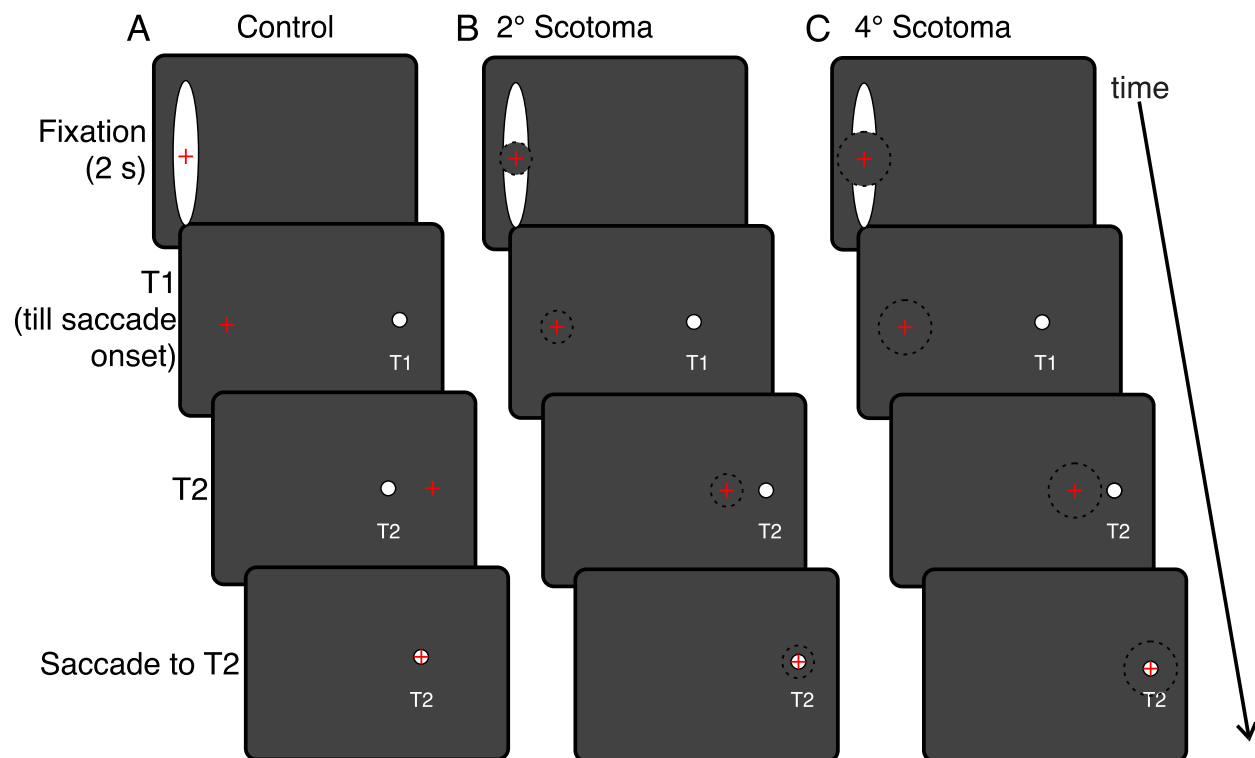

424

425 Stimuli and procedure (Experiment 2). The red cross represents the participant's gaze position.  
426 In (B) and (C), the black dotted circle outlines the scotoma. The black background of the screen  
427 is depicted as dark grey for visibility.

428  
429 In the scotoma conditions (*Fig. 4B & C*), a black circular central scotoma ( $2^\circ$  or  $4^\circ$ ) was present.  
430 It was the same colour as the background (i.e. black), and so, was invisible. Its presence was  
431 perceived only when occluding stimuli such as the fixation oval.

432 Participants took part in three sessions completing each at least a week apart in random order. Each  
433 session comprised three blocks. The first block was a pre-adaptation block, comprising 25 trials.  
434 In this block, only T1 was illuminated and extinguished at saccade onset. The second block was  
435 the adaptation block, comprising 200 trials with the presentation of both T1 and T2. The last block  
436 was the post-adaptation block, which was identical to the pre-adaptation block. In total participants  
437 performed 250 trials per session, which took 12 to 15 minutes. We increased the number of trials  
438 from the first experiment as forward adaptation typically takes longer than backward adaptation  
439 (Lévy-Bencheton et al., 2016).

440 Each trial began with the presentation of the fixation oval at which participants were asked to look.  
441 After 2000 ms, T1 appeared and participants were instructed to look at it as soon as it appeared.  
442 When a saccade was detected, T1 was extinguished and T2 was displayed. On average, T2  
443 appeared 2.25 ms after the time of peak saccade velocity (beginning of the deceleration phase). T2  
444 remained visible for 400 ms. For the two scotoma conditions, T2 was also presented for 400 ms,  
445 although it was not visible after the corrective saccade as it was covered by the scotoma. After an  
446 inter-trial interval of 400 ms, the fixation oval re-appeared and the next trial was initiated.

447

#### 448 **Data Analysis**

449 The same parameters and analysis methodology were used as in Exp. 1. We collected a total of  
450 9,747 trials from 13 participants. Trials were removed in which 1) saccades were made before the  
451 first target appeared, there was a blink during the saccade, the tracker lost eye position, or  
452 participants made eye movements not directed toward T1 (1,247 trials, 12.8% of total trials), 2)  
453 saccade reaction time was not between 80 and 500 ms (214 trials, 0.2%), 3) participant's  
454 normalized saccades did not begin near fixation stimulus center (122 trials, 0.13%), 4) first saccade  
455 amplitude was more than 2.5 standard deviations away from the mean for each session (144 trials,

456 0.15%), and 5) gain was more than 2.5 standard deviations away from the mean for each session  
457 (107 trials, 0.11%). In total, there remained 7,913 trials (81.2%).

458 **Results**

459 *Figure 5* depicts saccade endpoints for a typical participant in all three conditions, showing  
460 similar amounts of adaptation across the three conditions.

461 **Figure 5.**

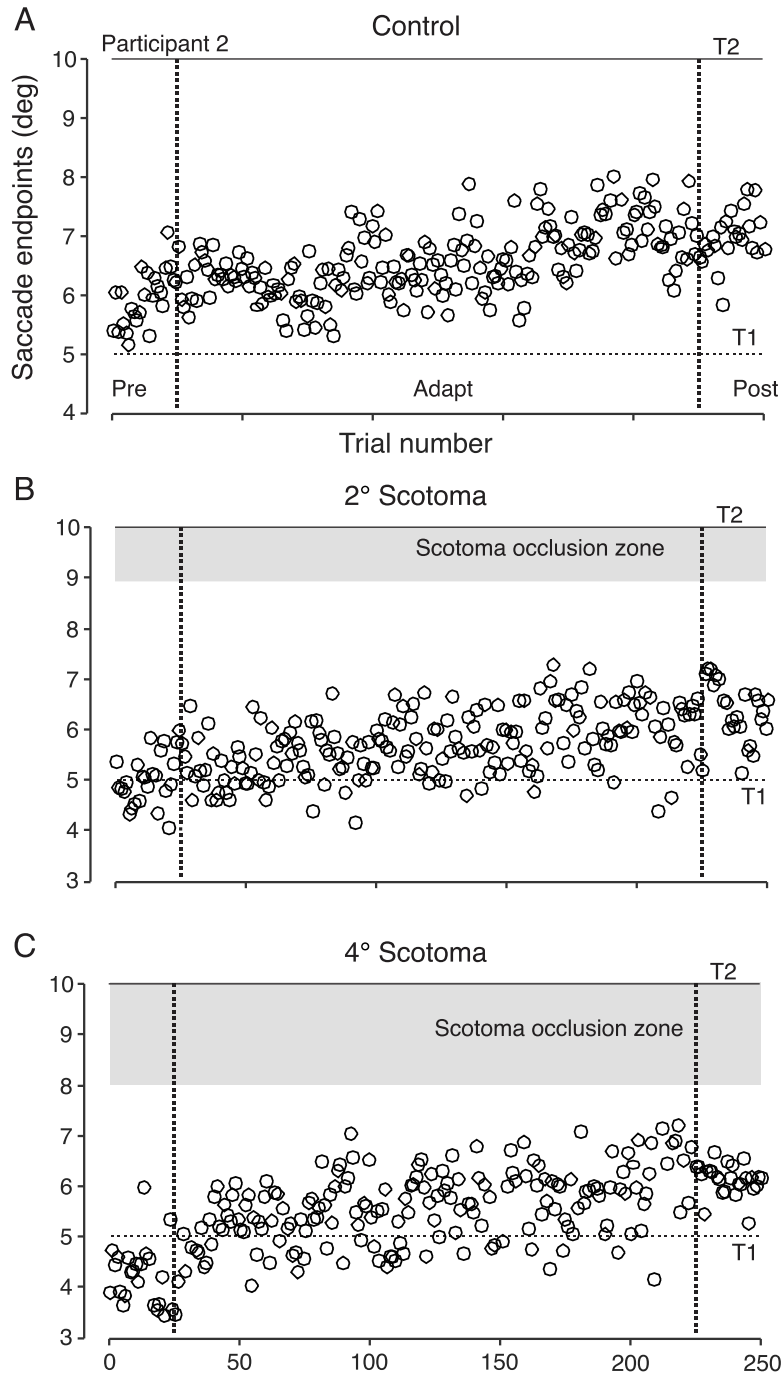

462

463 Saccade endpoints of a typical participant (Experiment 2). First saccade endpoints are denoted by  
464 black empty circles. Filled in grey is the scotoma occlusion zone, which is  $1^\circ$  or less away from  
465 T2 in (B) and  $2^\circ$  or less away from T2 in (C). Note that in both (B) and (C) there were no  
466 endpoints in the occlusion zone, in contrast to Experiment 1.

467

### 468 **Saccadic adaptation**

469 In *Fig. 6A* can be seen the mean gains for the pre- (white bars) and post-adaptation (gray filled  
470 bars) blocks for each condition as well as individual gains (thin black lines). We observed that  
471 participants were less consistent in demonstrating forward adaptation compared to backward  
472 adaptation in Exp. 1. Some individual participants even showed a decrease in gain. We performed  
473 a two-way repeated measures ANOVA on change in mean gain with condition (control,  $2^\circ$ , and  
474  $4^\circ$ ) and block (pre, post) as factors. The ANOVA revealed a significant main effect of condition  
475 ( $F(2,24) = 3.8, p = 0.037$ ) and a significant main effect of block ( $F(1,12) = 22.7, p < 0.001$ ), but  
476 no interaction effect ( $p > 0.05$ ). These results suggest that there was a significant increase in gain  
477 for all three conditions (mean pre gain = 0.99, mean post gain = 1.06). Bonferroni-corrected  
478 pairwise comparisons also revealed that the overall gain (collapsed across pre and post) was largest  
479 for the  $2^\circ$  scotoma condition ( $M = 1.05$ ), which was significantly different from the  $4^\circ$  scotoma  
480 condition ( $M = 1, p = 0.01$ ), but not from control ( $M = 1.02$ ).

481

482

483

484

485

486

487

488

489

490

491

492

493

494 **Figure 6.**

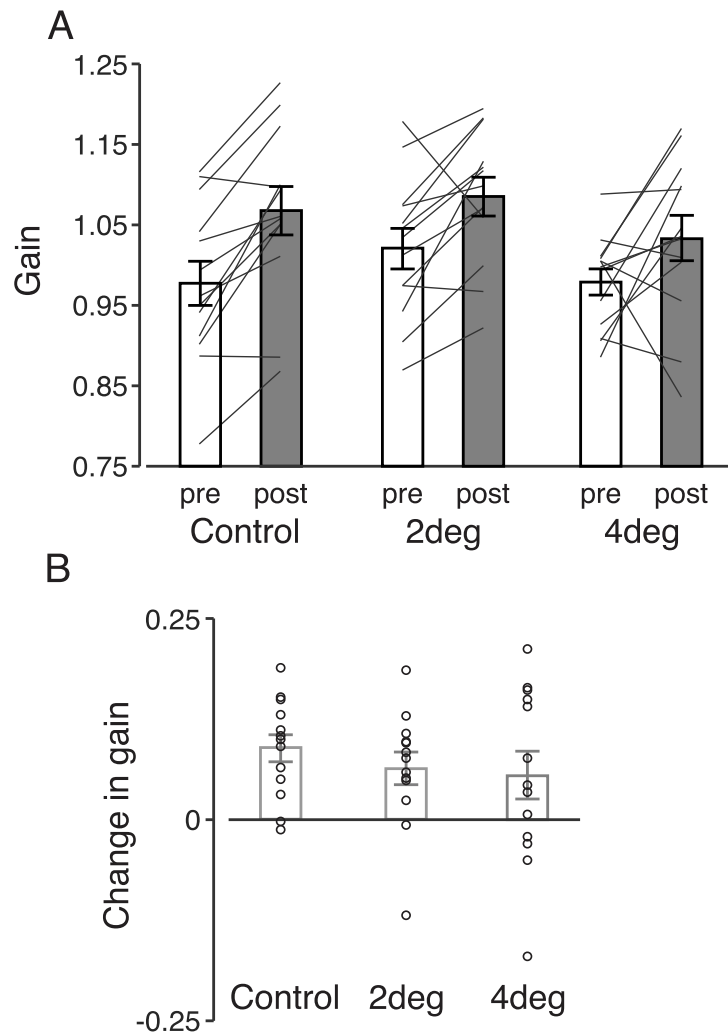

495

496 Mean saccade gain by block and condition (Experiment 2). Data are presented in the same manner  
497 as in Fig. 3.

498

499 In Fig. 6B can be seen the mean (bars) and individual (dots) change in mean gain for the three  
500 conditions. Interestingly, we observed with one-sample t-tests that the change in mean gain was  
501 not significantly different from 0 for the 4° scotoma condition ( $t(12) = 1.8, p = 0.09$ ), while it was  
502 significantly different for the other two conditions (control,  $t(12) = 5.3, p < 0.001$ ; 2°,  $t(12) = 3.2,$   
503  $p = 0.008$ ). Nevertheless, the change in mean gain was not significantly different across conditions,  
504 as shown by a one-way ANOVA ( $F(2,24) = 0.6, p = 0.5$ , control  $M = 0.089$ , 2°  $M = 0.064$ , 4°  $M =$   
505  $0.055$ ).

506

507 **Scotoma occlusion**

508 Unlike Exp. 1, very few saccade endpoints landed such that the scotoma occluded T2. For the 2°  
509 scotoma condition, 12 out of 13 participants had no saccades landing within this zone during the  
510 adaptation block and one participant had only 0.5% of saccades. For the 4° scotoma condition,  
511 only 3 out of 13 participants had saccades landing within the zone ( $M = 2.12\%$ ,  $SD = 0.63\%$ ).

512

513 **Corrective saccades**

514 Like in Exp. 1, we compared the proportion of corrective saccades with the change in gain across  
515 participants. Overall, there was a wide range in the percentage of adaptation trials with corrective  
516 saccades overall ( $M = 76.3\%$ ,  $SD = 34.8\%$ ), ranging from 100% to 1.4%, but a few participants  
517 were responsible for most of the variability. In particular, participant 6 made very few corrective  
518 saccades (<14% in the three conditions) as did participant 13 (<15%). The remaining 11  
519 participants made corrective saccades in most trials. This contrasts with Exp. 1 in which most  
520 participants did not make corrective saccades.

521 However, similar to Exp. 1, there were no significant differences across conditions (control,  $M =$   
522  $76.3\%$ ,  $SD = 38.6\%$ ; 2°,  $M = 77.2\%$ ,  $SD = 35.6\%$ ; 4°,  $M = 75.2\%$ ,  $SD = 32.7\%$ ;  $F(2,24) = 0.098$ ,  
523  $p = 0.9$ ). Moreover, there was no significant relationship between mean change in gain and the  
524 percentage of corrective saccades in any of the 3 conditions ( $p > 0.05$ ). Thus, corrective saccades  
525 did not play a role in adaptation.

526

527 **Experiment 2 summary**

528 Presence of the invisible scotoma (2° and 4°) resulted in similar amounts of adaptation compared  
529 to control, confirming results from Exp. 1 that occlusion of central vision does not affect saccadic  
530 adaptation. Unlike Exp. 1, we observed that there was almost no occlusion of T2 after the first  
531 saccade. This was because most saccades undershot T1, as is the general tendency for saccades  
532 (Becker & Fuchs, 1969; de Bie et al., 1987; Deubel et al., 1982; Kapoula, 1985).

533

534 **Discussion**

535 We measured the extent to which saccadic adaptation occurred in the presence of artificial central  
536 scotomas of different visibilities and sizes in both forward and backward paradigms. We observed

537 similar amounts of adaptation between scotoma and control conditions. In the backward adaptation  
538 paradigm, we observed adaptation even when the scotoma occluded the shifted target most of the  
539 time at the end of the saccade. Adaptation took place in response to the shifted target during the  
540 later stages of the ongoing saccade. In the forward adaptation paradigm, we also observed similar  
541 amounts of adaptation compared to control for two differently sized invisible scotomas. We  
542 conclude that saccadic adaptation occurs equally well in the presence of a central scotoma and that  
543 peripheral peri- and post-saccadic visual feedback of the shifted target location are sufficient to  
544 drive adaptation.

545 In the backward adaptation paradigm, the central scotoma often occluded T2 at the end of the first  
546 saccade, impeding adaptation. However, we observed that adaptation occurred equally well. There  
547 was similar adaptation across the three conditions, confirming previous findings (Panouillères et  
548 al., 2016; Panouillères et al., 2013). Specifically, it has been shown that intra-saccadic visual  
549 feedback received mid-flight during a saccade can cause adaptation (Panouillères et al., 2016;  
550 Panouillères et al., 2013). The effect of visual feedback timing was tested by comparing an intra-  
551 saccadic condition, in which the shifted target was displayed only during the saccade, and a post-  
552 saccadic condition, in which the shifted target was displayed after the saccade (Panouillères et al.,  
553 2013). The two conditions produced equal amounts of adaptation, for both backward and forward  
554 target shifts. In an additional experiment using backward target shifts, even displaying the target  
555 for 10 ms or 2 ms durations was sufficient to cause adaptation in the same manner as post-saccadic  
556 presentation, but only during the deceleration phase of the saccade and not acceleration phase or  
557 at peak velocity (Panouillères et al., 2016). To summarize, it appears that even intra-saccadic  
558 *peripheral* presentation of T2 is sufficient for adaptation and post-saccadic foveal or peri-foveal  
559 information does not increase the amount of adaptation.

560 While there was a consistent decrease in gain across all three conditions of the backward paradigm,  
561 there was less consistent gain change in the forward paradigm, with some participants even  
562 showing gain decrease. This is consistent with previous findings which show that forward  
563 adaptation does not always result in gain increase, particularly for target shifts of less than 50% of  
564 target eccentricity (Robinson et al., 2003). Other studies have also demonstrated that a larger  
565 number of trials are needed to elicit gain increase (equal in magnitude to gain decrease in backward  
566 adaptation) in forward adaptation (Deubel et al., 1986; Miller et al., 1981; Straube et al., 1997). It

567 has been proposed that forward and backward adaptation are based on different mechanisms in the  
568 brain (Ethier et al., 2008; Hernandez et al., 2008; Pélisson et al., 2010; Semmlow et al., 1989)  
569 which would likely lead to different behavioral patterns.

570 We also investigated differences in the number of corrective saccades across conditions and if this  
571 was related to the amount of adaptation. In both cases, we found no differences and no relationship,  
572 confirming that corrective saccades did not play a role in adaptation. Specifically, it appears that  
573 making a corrective saccade to T2 after the first saccade to T1 did not play a role in determining  
574 the error for which the saccade must compensate. In addition, the lack of difference across all  
575 conditions demonstrates that the scotoma did not influence corrective saccades. As for how  
576 corrective saccades would influence adaptation, most previous studies show they are insignificant:  
577 removing corrective saccades had almost no effect on saccade gain and changing the direction of  
578 corrective saccades had no influence either (Noto & Robinson, 2001; Wallman & Fuchs, 1998).

579 For both backward and forward adaptation, we observed that foveal feedback of T2 was not  
580 important. In the backward paradigm, neither the visible nor the invisible scotoma condition was  
581 different from control in the amount of adaptation. In the forward paradigm, there was no  
582 significant difference across conditions in the amount of adaptation. While it is well established  
583 that foveal feedback of the shifted target is unnecessary for adaptation, the nature of the error signal  
584 that drives adaptation is still unresolved. It was once proposed that visual retinal error (how far off  
585 the fovea is from the target post-saccade) drove adaptation (Noto & Robinson, 2001; Wallman &  
586 Fuchs, 1998). Recent studies suggest that adaptation is caused not by retinal error per se, but by  
587 the difference between the retinal image (post-saccade) and the predicted image (pre-saccade),  
588 also referred to as the visual comparison model (Bahcall & Kowler, 2000). Retinal error is not an  
589 adequate error signal in a real world scenario, such as scanning scenery in nature, in which it would  
590 be difficult to determine retinal error because of the numerous visual objects that can take on a  
591 variety of shapes (Bahcall & Kowler, 2000). Bahcall and Kowler (2000) also demonstrated  
592 saccadic adaptation during a task in which participants were instructed to saccade partway to a  
593 target (75% of the distance from initial fixation point). In this case, the retinal error would always  
594 be positive. However, the target was shifted backwards, and this resulted in gain decrease rather  
595 than increase as adaptation driven by retinal error would suggest. The visual comparison model is  
596 analogous to the more general sensory prediction error (SPE) hypothesis proposed by some to



597 drive adaptation, defined as the discrepancy between predicted and actual sensory signals (Herman  
598 et al., 2013). There is evidence for sensory prediction errors in the visuomotor system (Mazzoni  
599 & Krakauer, 2006; Shadmehr et al., 2010; Tseng et al., 2007) as well as visual perception (Alink  
600 et al., 2010; Den Ouden et al., 2012; Meyer & Olson, 2011).

601 We observed no significant difference in the amount of mean gain change between control and  
602 scotoma conditions, regardless of the size of the scotoma, albeit we tested using relatively small  
603 diameters. These results support the idea that saccadic adaptation could be possible in patients with  
604 AMD as a means of training. We speculate that adaptation could be used to adapt eye position  
605 such that the desired target lands on the PRL after the first saccade by training for numerous trials.  
606 We also found similar adaptation with both visible and invisible central scotomas, suggesting that  
607 adaptation could occur even when patients are unaware of the presence of the scotoma itself  
608 (Fletcher et al., 2012). It has been suggested however that scotoma awareness is a possible tool for  
609 rehabilitation for patients with central vision loss (Scheiman et al., 2007; Walsh & Liu, 2014). This  
610 could be achieved using a gaze-contingent visible scotoma with the shape of the patient's scotoma  
611 but slightly larger and may aid patients in reinforcing adaptation to make optimal use of their  
612 peripheral vision (Barraza-Bernal et al., 2017; Walsh & Liu, 2014). Generally, the effects of  
613 saccadic adaptation have been shown to remain for a short duration, typically under a week  
614 (Alahyane & Pélisson, 2005). But, this could be because saccades which direct the object of  
615 interest outside the fovea are not optimal for healthy participants. If AMD patients are trained so  
616 that saccades direct targets to the PRL, it could be beneficial to them, and therefore the effects of  
617 adaptation might be reinforced and better maintained.

618 In conclusion, we showed that both backward and forward adaptation occurred equally well in the  
619 presence of an artificial gaze-contingent central scotoma as without. We propose using saccadic  
620 adaptation as a means of training saccade re-referencing for people with central vision loss.

621

622

623

624 **Acknowledgements**

625 AZK was funded by the Canada Research Chair program and the National Sciences and

626 Engineering Research Council of Canada

627

628

629

630

631

632

633  
634  
635  
636  
637  
638  
639  
640  
641  
642  
643  
644  
645  
646  
647  
648  
649  
650  
651  
652  
653  
654  
655

## References

- Aguilar, C., & Castet, E. (2011). Gaze-contingent simulation of retinopathy: some potential pitfalls and remedies. *Vision Research*, *51*(9), 997–1012.  
<https://doi.org/10.1016/j.visres.2011.02.010>
- Alahyane, N., & Pélisson, D. (2005). Long-lasting modifications of saccadic eye movements following adaptation induced in the double-step target paradigm. *Learning & Memory (Cold Spring Harbor, N.Y.)*, *12*(4), 433–443. PubMed. <https://doi.org/10.1101/lm.96405>
- Albano, J. E., & King, W. M. (1989). Rapid adaptation of saccadic amplitude in humans and monkeys. *Investigative Ophthalmology & Visual Science*, *30*(8), 1883–1893.
- Alink, A., Schwiedrzik, C. M., Kohler, A., Singer, W., & Muckli, L. (2010). Stimulus predictability reduces responses in primary visual cortex. *The Journal of neuroscience: the official journal of the Society for Neuroscience*, *30*(8), 2960–2966.  
<https://doi.org/10.1523/JNEUROSCI.3730-10.2010>
- Bahcall, D. O., & Kowler, E. (2000). The control of saccadic adaptation: implications for the scanning of natural visual scenes. *Vision Research*, *40*(20), 2779–2796.  
[https://doi.org/10.1016/S0042-6989\(00\)00117-6](https://doi.org/10.1016/S0042-6989(00)00117-6)
- Barraza-Bernal, M. J., Rifai, K., & Wahl, S. (2017). A preferred retinal location of fixation can be induced when systematic stimulus relocations are applied. *Journal of Vision*, *17*(2), 11–11. <https://doi.org/10.1167/17.2.11>
- Becker, W., & Fuchs, A. F. (1969). Further properties of the human saccadic system: eye movements and correction saccades with and without visual fixation points. *Vision Research*, *9*(10), 1247–1258. [https://doi.org/10.1016/0042-6989\(69\)90112-6](https://doi.org/10.1016/0042-6989(69)90112-6)
- Brainard, D. H., & Vision, S. (1997). The psychophysics toolbox. *Spatial Vision*, *10*, 433–436.

- 656 Cacho, I., Dickinson, C. M., Smith, H. J., & Harper, R. A. (2010). Clinical impairment measures  
657 and reading performance in a large age-related macular degeneration group. *Optometry and*  
658 *Vision Science: Official Publication of the American Academy of Optometry*, 87(5), 344–  
659 349. PubMed. <https://doi.org/10.1097/opx.0b013e3181d9515c>
- 660 Catz, N., Dicke, P. W., & Thier, P. (2008). Cerebellar-dependent motor learning is based on  
661 pruning a Purkinje cell population response. *Proceedings of the National Academy of*  
662 *Sciences*, 105(20), 7309. <https://doi.org/10.1073/pnas.0706032105>
- 663 Cheung, S., & Legge, G. E. (2005). Functional and cortical adaptations to central vision loss.  
664 *Visual Neuroscience*, 22(2), 187–201. Cambridge Core.  
665 <https://doi.org/10.1017/S0952523805222071>
- 666 Chung S. T. (2013). Cortical reorganization after long-term adaptation to retinal lesions in  
667 humans. *The Journal of neuroscience: the official journal of the Society for Neuroscience*,  
668 33(46), 18080–18086. <https://doi.org/10.1523/JNEUROSCI.2764-13.2013>
- 669 Cornelissen, F. W., Peters, E. M., & Palmer, J. (2002). The Eyelink Toolbox: eye tracking with  
670 MATLAB and the Psychophysics Toolbox. *Behavior research methods, instruments, &*  
671 *computers: a journal of the Psychonomic Society, Inc*, 34(4), 613–617.  
672 <https://doi.org/10.3758/bf03195489>
- 673 Crossland, M. D., Culham, L. E., Kabanarou, S. A., & Rubin, G. S. (2005). Preferred retinal  
674 locus development in patients with macular disease. *Ophthalmology*, 112(9), 1579–1585.  
675 <https://doi.org/10.1016/j.ophtha.2005.03.027>
- 676 de Bie, J., van den Brink, G., & van Sonderen, J. F. (1987). The systematic undershoot of  
677 saccades: a localization or an oculomotor phenomenon? In J. K. O'Regan & A. Levy-Schoen

- 678 (Eds.), *Eye Movements from Physiology to Cognition* (pp. 85–94). Elsevier.  
679 <https://doi.org/10.1016/B978-0-444-70113-8.50013-8>
- 680 De Gennaro, L., Ferrara, M., Curcio, G., & Bertini, M. (2001). Visual search performance across  
681 40 h of continuous wakefulness: measures of speed and accuracy and relation with  
682 oculomotor performance. *Physiology & behavior*, *74*(1-2), 197–204.  
683 [https://doi.org/10.1016/S0031-9384\(01\)00551-0](https://doi.org/10.1016/S0031-9384(01)00551-0)
- 684 De Gennaro, L., Ferrara, M., Urbani, L., & Bertini, M. (2000). Oculomotor impairment after 1  
685 night of total sleep deprivation: a dissociation between measures of speed and accuracy.  
686 *Clinical Neurophysiology*, *111*(10), 1771–1778. [https://doi.org/10.1016/S1388-](https://doi.org/10.1016/S1388-2457(00)00393-X)  
687 [2457\(00\)00393-X](https://doi.org/10.1016/S1388-2457(00)00393-X)
- 688 Den Ouden, H., Kok, P., & De Lange, F. (2012). How Prediction Errors Shape Perception,  
689 Attention, and Motivation. *Frontiers in Psychology*, *3*, 548.  
690 <https://doi.org/10.3389/fpsyg.2012.00548>
- 691 Deubel, H., Wolf, W., & Hauske, G. (1982). Corrective saccades: effect of shifting the saccade  
692 goal. *Vision Research*, *22*(3), 353–364. [https://doi.org/10.1016/0042-6989\(82\)90151-1](https://doi.org/10.1016/0042-6989(82)90151-1)
- 693 Deubel, H., Wolf, W., & Hauske, G. (1986). Adaptive gain control of saccadic eye movements.  
694 *Human Neurobiology*, *5*(4), 245–253. PubMed.
- 695 Ethier, V., Zee, D. S., & Shadmehr, R. (2008). Changes in control of saccades during gain  
696 adaptation. *The Journal of Neuroscience*, *28*(51), 13929.  
697 <https://doi.org/10.1523/JNEUROSCI.3470-08.2008>
- 698 Fletcher, D. C., & Schuchard, R. A. (1997). Preferred retinal loci relationship to macular  
699 scotomas in a low-vision population. *Ophthalmology*, *104*(4), 632–638.  
700 [https://doi.org/10.1016/S0161-6420\(97\)30260-7](https://doi.org/10.1016/S0161-6420(97)30260-7)

- 701 Fletcher, D. C., Schuchard, R. A., & Renninger, L. W. (2012). Patient awareness of binocular  
702 central scotoma in age-related macular degeneration. *Optometry and Vision Science: Official  
703 Publication of the American Academy of Optometry*, 89(9), 1395–1398. PubMed.  
704 <https://doi.org/10.1097/opx.0b013e318264cc77>
- 705 Fuchs, A. F., & Binder, M. D. (1983). Fatigue resistance of human extraocular muscles. *Journal  
706 of Neurophysiology*, 49(1), 28–34. <https://doi.org/10.1152/jn.1983.49.1.28>
- 707 Golla, H., Tziridis, K., Haarmeier, T., Catz, N., Barash, S., & Thier, P. (2008). Reduced saccadic  
708 resilience and impaired saccadic adaptation due to cerebellar disease. *European Journal of  
709 Neuroscience*, 27(1), 132–144. <https://doi.org/10.1111/j.1460-9568.2007.05996.x>
- 710 Herman, J. P., Blangero, A., Madelain, L., Khan, A., & Harwood, M. R. (2013). Saccade  
711 adaptation as a model of flexible and general motor learning. *Experimental Eye Research*,  
712 114, 6–15. <https://doi.org/10.1016/j.exer.2013.04.001>
- 713 Hernandez, T. D., Levitan, C. A., Banks, M. S., & Schor, C. M. (2008). How does saccade  
714 adaptation affect visual perception? *Journal of Vision*, 8(8), 3–3.  
715 <https://doi.org/10.1167/8.8.3>
- 716 Kapoula, Z. (1985). Evidence for a range effect in the saccadic system. *Vision Research*, 25(8),  
717 1155–1157. [https://doi.org/10.1016/0042-6989\(85\)90105-1](https://doi.org/10.1016/0042-6989(85)90105-1)
- 718 Krauzlis, R. J., Goffart, L., & Hafed, Z. M. (2017). Neuronal control of fixation and fixational  
719 eye movements. *Philosophical Transactions of the Royal Society B: Biological Sciences*,  
720 372(1718), 20160205. <https://doi.org/10.1098/rstb.2016.0205>
- 721 Lévy-Bencheton, D., Khan, A. Z., Péliisson, D., Tilikete, C., & Pisella, L. (2016). Adaptation of  
722 Saccadic Sequences with and without Remapping. *Frontiers in human neuroscience*, 10,  
723 359. <https://doi.org/10.3389/fnhum.2016.00359>

- 724 Mazzoni, P., & Krakauer, J. W. (2006). An implicit plan overrides an explicit strategy during  
725 visuomotor adaptation. *The Journal of neuroscience: the official journal of the Society for*  
726 *Neuroscience*, 26(14), 3642–3645. <https://doi.org/10.1523/JNEUROSCI.5317-05.2006>
- 727 McLaughlin, S. C. (1967). Parametric adjustment in saccadic eye movements. *Perception &*  
728 *Psychophysics*, 2(8), 359–362. <https://doi.org/doi:10.3758/bf03210071>
- 729 Meyer, T., & Olson, C. R. (2011). Statistical learning of visual transitions in monkey  
730 inferotemporal cortex. *Proceedings of the National Academy of Sciences of the United States*  
731 *of America*, 108(48), 19401–19406. <https://doi.org/10.1073/pnas.1112895108>
- 732 Miller, J. M., Anstis, T., & Templeton, W. B. (1981). Saccadic plasticity: parametric adaptive  
733 control by retinal feedback. *Journal of experimental psychology. Human perception and*  
734 *performance*, 7(2), 356–366. <https://doi.org/10.1037//0096-1523.7.2.356>
- 735 Nilsson, U., Frennesson, C., & Nilsson, S. (1998). Location and stability of a newly established  
736 eccentric retinal locus suitable for reading, achieved through training of patients with a dense  
737 central scotoma. *Optometry and Vision Science: Official Publication of the American*  
738 *Academy of Optometry*, 75(12), 873–878. PubMed.
- 739 Noto, C. T., & Robinson, F. R. (2001). Visual error is the stimulus for saccade gain adaptation.  
740 *Cognitive Brain Research*, 12(2), 301–305. [https://doi.org/10.1016/S0926-6410\(01\)00062-3](https://doi.org/10.1016/S0926-6410(01)00062-3)
- 741 Panouillères, M. T. N., Gaveau, V., Debatisse, J., Jacquin, P., LeBlond, M., & Pélisson, D.  
742 (2016). Oculomotor adaptation elicited by intra-saccadic visual stimulation: time-course of  
743 efficient visual target perturbation. *Frontiers in Human Neuroscience*, 10, 91.  
744 <https://doi.org/10.3389/fnhum.2016.00091>

- 745 Panouillères, M., Gaveau, V., Socasau, C., Urquizar, C., & Pélişson, D. (2013). Brain processing  
746 of visual information during fast eye movements maintains motor performance. *PLOS ONE*,  
747 8(1), e54641. <https://doi.org/10.1371/journal.pone.0054641>
- 748 Panouillères, M., Weiss, T., Urquizar, C., Salemme, R., Munoz, D. P., & Pélişson, D. (2009).  
749 Behavioral evidence of separate adaptation mechanisms controlling saccade amplitude  
750 lengthening and shortening. *Journal of neurophysiology*, 101(3), 1550–1559.  
751 <https://doi.org/10.1152/jn.90988.2008>
- 752 Pélişson, D., Alahyane, N., Panouillères, M., & Tilikete, C. (2010). Sensorimotor adaptation of  
753 saccadic eye movements. *Neuroscience & Biobehavioral Reviews*, 34(8), 1103–1120.  
754 <https://doi.org/10.1016/j.neubiorev.2009.12.010>
- 755 Pelli D. G. (1997). The VideoToolbox software for visual psychophysics: transforming numbers  
756 into movies. *Spatial vision*, 10(4), 437–442.
- 757 Robinson, F. R., Noto, C. T., & Bevans, S. E. (2003). Effect of visual error size on saccade  
758 adaptation in monkey. *Journal of neurophysiology*, 90(2), 1235–1244.  
759 <https://doi.org/10.1152/jn.00656.2002>
- 760 Rowland, L. M., Thomas, M. L., Thorne, D. R., Sing, H. C., Krichmar, J. L., Davis, H. Q.,  
761 Balwinski, S. M., Peters, R. D., Kloeppe-Wagner, E., Redmond, D. P., Alicandri, E., &  
762 Belenky, G. (2005). Oculomotor responses during partial and total sleep deprivation.  
763 *Aviation, space, and environmental medicine*, 76(7 Suppl), C104–C113.
- 764 Saito, S. (1992). Does fatigue exist in a quantitative measurement of eye movements?  
765 *Ergonomics*, 35(5–6), 607–615. <https://doi.org/10.1080/00140139208967840>



- 766 Scheiman, M., Scheiman, M., & Whittaker, S. (2007). *Low Vision Rehabilitation: A Practical*  
767 *Guide for Occupational Therapists*. SLACK Incorporated.  
768 <https://books.google.ca/books?id=xGKXuM7H6SMC>
- 769 Semmlow, J. L., Gauthier, G. M., & Vercher, J.-L. (1989). Mechanisms of short-term saccadic  
770 adaptation. *Journal of Experimental Psychology: Human Perception and Performance*,  
771 *15*(2), 249–258. <https://doi.org/10.1037/0096-1523.15.2.249>
- 772 Shadmehr, R., Smith, M. A., & Krakauer, J. W. (2010). Error correction, sensory prediction, and  
773 adaptation in motor control. *Annual review of neuroscience*, *33*, 89–108.  
774 <https://doi.org/10.1146/annurev-neuro-060909-153135>
- 775 Zils, E., Sprenger, A., Heide, W., Born, J., & Gais, S. (2005). Differential effects of sleep  
776 deprivation on saccadic eye movements. *Sleep*, *28*(9), 1109–1115.  
777 <https://doi.org/10.1093/sleep/28.9.1109>
- 778 Straube, A., Robinson, F. R., & Fuchs, A. F. (1997). Decrease in saccadic performance after  
779 many visually guided saccadic eye movements in monkeys. *Investigative Ophthalmology &*  
780 *Visual Science*, *38*(13), 2810–2816.
- 781 Straube, A., & Deubel, H. (1995). Rapid gain adaptation affects the dynamics of saccadic eye  
782 movements in humans. *Vision research*, *35*(23-24), 3451–3458.  
783 [https://doi.org/10.1016/0042-6989\(95\)00076-q](https://doi.org/10.1016/0042-6989(95)00076-q)
- 784 Straube, A., Fuchs, A. F., Usher, S., & Robinson, F. R. (1997). Characteristics of saccadic gain  
785 adaptation in rhesus macaques. *Journal of neurophysiology*, *77*(2), 874–895.  
786 <https://doi.org/10.1152/jn.1997.77.2.874>
- 787 Sunness, J. S., Applegate, C. A., Haselwood, D., & Rubin, G. S. (1996). Fixation patterns and  
788 reading rates in eyes with central scotomas from advanced atrophic age-related macular

789 degeneration and Stargardt disease. *Ophthalmology*, 103(9), 1458–1466.  
790 [https://doi.org/10.1016/s0161-6420\(96\)30483-1](https://doi.org/10.1016/s0161-6420(96)30483-1)

791 Tseng, Y. W., Diedrichsen, J., Krakauer, J. W., Shadmehr, R., & Bastian, A. J. (2007). Sensory  
792 prediction errors drive cerebellum-dependent adaptation of reaching. *Journal of*  
793 *neurophysiology*, 98(1), 54–62. <https://doi.org/10.1152/jn.00266.2007>

794 Wallman, J., & Fuchs, A. F. (1998). Saccadic gain modification: visual error drives motor  
795 adaptation. *Journal of neurophysiology*, 80(5), 2405–2416.  
796 <https://doi.org/10.1152/jn.1998.80.5.2405>

797 Walsh, D. V., & Liu, L. (2014). Adaptation to a simulated central scotoma during visual search  
798 training. *Vision Research*, 96, 75–86. <https://doi.org/10.1016/j.visres.2014.01.005>

799 White, J. M., & Bedell, H. E. (1990). The oculomotor reference in humans with bilateral macular  
800 disease. *Investigative Ophthalmology & Visual Science*, 31(6), 1149–1161.  
801
